# Supplementary material for: Identifying Breeding Priorities for Blueberry Flavor Using Biochemical, Sensory, and Genotype by Environment Analyses
Source: PLoS One. 2015 Sep 17;10(9):e0138494. doi: 10.1371/journal.pone.0138494 (PMC4574478; doi:10.1371/journal.pone.0138494)
Supplement: S2 Table — (XLSX) [file pone.0138494.s002.xlsx]

## Sheet: S2 Table
S2 Table. Sensory ratings and biochemical measures of all samples from 2012-2014.
																									V1	V2	V3	V4	V5	V6	V7	V8	V9	V10	V11	V12	V13	V14	V15	V16	V17	V18	V19	V20	V21	V22	V23	V24	V25
																									3-Methyl Butanal	1-​Penten-​3-​ol	2-​Pentanone	Pentanal	Propanoic acid, ethyl ester	Butanoic acid, methyl ester	3-Methyl-1-butanol	E-​2-Pentenal	1-​Pentanol	Z-2-​Penten-​1-​ol	Benzene, methyl-	Methyl isovalerate	Hexanal	E-2-Hexenal	E-2-​Hexen-​1-​ol	1-​Hexanol	Isoamyl acetate	2-​Heptanone	Heptanal	Prenyl acetate	Methyl hexanoate	α-Pinene	6-Methyl-2-​Heptanone	Hexanoic acid	6-Methyl-5-hepten-2-one
gID	Year	Location	Harvest#	Genotype	SSC	TA	SSC/TA	pH	Panelists	Overall Liking	Texture	Sweetness	Sourness	Flavor	LSOVERALL LIKING	LSTEXTURE	LSSWEETNESS	LSSOURNESS	LSFLAVOR	Fructose	Glucose	Sucrose	Total Sugar	Volatile Measures	590-86-3	616-25-1	107-87-9	110-62-3	105-37-3	623-42-7	123-51-3	1576-87-0	71-41-0	1576-95-0	108-88-3	556-24-1	66-25-1	6728-26-3	928-95-0	111-27-3	123-92-2	110-43-0	111-71-7	1191-16-8	106-70-7	7785-70-8	928-68-7	142-62-1	110-93-0
UNIT					%SS	%TA	%SS/%TA	pH	N	[-100,+100]	[-100,+100]	[0,+100]	[0,+100]	[0,+100]	[-100,+100]	[-100,+100]	[0,+100]	[0,+100]	[0,+100]	mg gFW-1	mg gFW-1	mg gFW-1	mg gFW-1		ng gFW-1 h-1	ng gFW-1 h-1	ng gFW-1 h-1	ng gFW-1 h-1	ng gFW-1 h-1	ng gFW-1 h-1	ng gFW-1 h-1	ng gFW-1 h-1	ng gFW-1 h-1	ng gFW-1 h-1	ng gFW-1 h-1	ng gFW-1 h-1	ng gFW-1 h-1	ng gFW-1 h-1	ng gFW-1 h-1	ng gFW-1 h-1	ng gFW-1 h-1	ng gFW-1 h-1	ng gFW-1 h-1	ng gFW-1 h-1	ng gFW-1 h-1	ng gFW-1 h-1	ng gFW-1 h-1	ng gFW-1 h-1	ng gFW-1 h-1
																								GC-FID Retention Time	4.74	5.3	5.43	5.66	5.94	6.33	6.61	7.22	7.55	7.66	7.74	7.89	8.73	10.74	11	11.07	11.27	11.76	12.16	12.88	12.96	13.63		14.6	15.23
																								Response Factor (ng)	0.14	0.16	0.15	0.14	0.11	0.11	0.15	0.14	0.16	0.17	0.22	0.13	0.12	0.15	0.17	0.16	0.13	0.17	0.16	0.18	0.15	0.22	0.17	0.14	0.17
2012 C1 Emerald	2012	C	1	Emerald	10.4	0.511	20.4	3.43	95	23.5	24.9	22.4	10.7	25	23.2	25.4	22.2	10.1	24.6	48.74	49.39	0.13	98.26	Elution Norm - BG / gFW / RF(ng) / 2h	1.05	7.2	3.79	4.79	0	0.11	0.33	4.46	0.94	1.92	0.03	0.09	1196.56	4345.51	355.57	190.77	0	0.72	0.9	0	0.08	0	0.32	0.42	2.42
2012 C1 Endura	2012	C	1	Endura	10.5	0.6199	16.9	3.36	95	17.5	25.1	19.2	22.6	27.8	17.2	25.6	18.9	22.1	27.3	47.79	46.49	0.19	94.47	Elution Norm - BG / gFW / RF(ng) / 2h	1.4	8.31	3.56	4.32	0	0.43	0.55	3.73	0.7	2.32	0.08	8.7	907.13	5165.84	401.18	254.44	0	1.35	0.53	0.22	0.26	0.05	0.43	0.33	2.54
2012 C1 Farthing	2012	C	1	Farthing	10.6	0.3064	34.6	3.55	95	24.2	23.9	23.6	11.8	26.5	23.9	24.4	23.4	11.3	26	51.31	51.66	0.18	103.15	Elution Norm - BG / gFW / RF(ng) / 2h	0.82	5.27	21.69	4.53	0	0.13	0.59	3.05	0.87	1.21	0	7.65	1058.29	3146.05	358.01	166.66	0	1.61	0.35	0.28	0.05	0	0.07	0.37	1.53
2012 C1 Meadowlark	2012	C	1	Meadowlark	9.2	0.2631	34.8	3.78	95	22.3	28.7	21.5	11.2	24.4	22	29.2	21.3	10.6	23.9	42.57	45.11	0.12	87.79	Elution Norm - BG / gFW / RF(ng) / 2h	0.85	5.25	5.87	4.2	0	0.2	0.24	2.12	1.23	1.52	0.02	43.87	1380.1	4123.45	390.25	245.92	0	2.62	0.49	0	0.09	0	0.46	0.33	12.18
2012 C1 Primadonna	2012	C	1	Primadonna	11.3	0.2346	48.2	3.95	95	24	23.6	25.5	10.4	25.8	23.7	24.1	25.3	9.8	25.4	56.83	56.35	0.21	113.39	Elution Norm - BG / gFW / RF(ng) / 2h	1.82	7.33	6.88	7.47	0	0.36	0.5	4.93	1.53	1.67	0.16	216.42	1766.28	4999.2	290.46	226.99	0	0.78	1.02	0	0.25	0	0.31	0.65	5.21
2012 C1 Scintilla	2012	C	1	Scintilla	12.9	0.4719	27.3	3.4	95	24.3	23.6	24.6	14.4	24.9	24	24.1	24.4	13.9	24.5	62.4	62.46	1.76	126.62	Elution Norm - BG / gFW / RF(ng) / 2h	1.76	5.28	0.77	4.83	0	0.04	0.99	2.3	0.81	1.36	0.03	6.67	1379.83	3488.36	272.86	165.15	0	1.69	0.78	0.21	0.21	0	0.1	0.5	1.31
2012 C2 Emerald	2012	C	2	Emerald	10.6	0.3992	26.6	3.54	90	20	23	20.2	13.6	22.3	21.1	24.6	21.1	14	23.2	48.12	49.15	0.22	97.48	Elution Norm - BG / gFW / RF(ng) / 2h	0.77	5.06	3.69	5.95	0	0.08	0.2	3.54	2.39	1.27	0.01	0.15	1166	3426.35	172.85	121.11	0	1.51	0.75	0	0.05	0	0.36	0.23	1.76
2012 C2 Endura	2012	C	2	Endura	9.8	0.5402	18.1	3.31	90	12.6	22.3	17.4	19	22	13.7	23.8	18.3	19.4	23	43.35	42.11	0.17	85.64	Elution Norm - BG / gFW / RF(ng) / 2h	1.14	7.93	2.58	6.5	0.24	0.55	0.53	3.68	2.69	2.14	0.09	5.69	1014.14	4856.85	360.71	228.86	0	2.33	0.53	0.22	0.24	0.02	1.05	0.53	2.22
2012 C2 Farthing	2012	C	2	Farthing	10.8	0.3365	32.1	3.5	90	26.1	27.1	26.6	10	26.7	27.2	28.7	27.5	10.4	27.6	48.94	47.94	0.19	97.07	Elution Norm - BG / gFW / RF(ng) / 2h	0.83	5.86	6.08	7.55	0.01	0.13	0.47	3.95	1.93	1.36	0.16	7.13	1475.54	4031.57	273.87	143.28	0	3.02	0.79	0.35	0.07	0	0.65	0.5	1.76
2012 C2 Meadowlark	2012	C	2	Meadowlark	10	0.2666	37.5	3.78	90	22.3	26.8	25	8.4	25.2	23.4	28.4	25.9	8.8	26.2	42.9	45.65	0.53	89.07	Elution Norm - BG / gFW / RF(ng) / 2h	0.94	5.62	3.7	6.55	0	0.21	0.12	2.38	2.41	1.29	0.14	29.02	1680.9	4345.35	332.59	223.61	0	5.03	0.77	0	0.27	0.02	1.76	0.59	9.84
2012 C2 Primadonna	2012	C	2	Primadonna	11	0.192	57.1	4	90	21.6	19.5	25.7	9.4	25.6	22.7	21.1	26.6	9.8	26.6	51.14	51.31	0.41	102.87	Elution Norm - BG / gFW / RF(ng) / 2h	1.48	4.92	3.59	6.94	0	0.21	0.18	3.42	1.64	1.01	0.03	134.3	1435.54	3832.78	162.7	152.34	0	1.78	1.06	0	0.05	0.01	0.89	0.72	4.54
2012 C2 Scintilla	2012	C	2	Scintilla	12.6	0.483	26.2	3.33	90	31.9	29.2	29.6	12.2	30.4	33	30.8	30.5	12.6	31.3	57.76	58.76	1.89	118.41	Elution Norm - BG / gFW / RF(ng) / 2h	1.74	4.63	0.4	5.99	0.07	0.06	0.77	2.45	1.58	1.12	0.24	3.72	1683.21	3580.06	192.22	132.62	0	4.22	0.72	0.22	0	0	0.54	0.99	1.05
2012 C3 Emerald	2012	C	3	Emerald	11	0.3308	33.4	3.54	85	23.9	23.6	22.7	13.9	24.9	24.7	25.3	23.1	13.1	25	49.88	47.04	0.17	97.1	Elution Norm - BG / gFW / RF(ng) / 2h	0.54	5.16	0.2	5.29	0	0.07	0.3	3.9	1.19	1.21	0.02	0.69	1432.94	3513.2	256.41	171.7	0.01	0.73	0.82	0	0.05	0	0.82	0.4	1.97
2012 C3 Endura	2012	C	3	Endura	10	0.3045	33	3.43	85	21.3	23.5	22.7	17.3	26.9	22.2	25.2	23	16.6	27	43.71	36.16	0.3	80.16	Elution Norm - BG / gFW / RF(ng) / 2h	0.81	5.03	0.24	3.91	0.15	0.37	0.48	3.29	0.8	1.25	0.05	20.01	1280.59	4634.24	150.1	163.51	0	0.65	0.6	0	0.31	0.01	1.05	0.49	2.41
2012 C3 Farthing	2012	C	3	Farthing	10.8	0.2249	48	3.61	85	20.7	20.6	21.2	10.3	22.5	21.6	22.4	21.5	9.5	22.5	47.74	44.09	0.16	91.99	Elution Norm - BG / gFW / RF(ng) / 2h	0.77	4.41	1.07	5.8	0	0.12	0.32	3.29	0.94	0.99	0.06	19.93	1326.75	3186.12	203.03	137.28	0	1.39	0.66	0.29	0	0	0.68	0.3	1.99
2012 C3 Meadowlark	2012	C	3	Meadowlark	10	0.1622	61.6	3.97	85	21.9	23.2	25.2	8.5	24.2	22.8	25	25.6	7.7	24.3	40.36	39.37	0.17	79.91	Elution Norm - BG / gFW / RF(ng) / 2h	0.54	3.92	0.99	3.81	0.31	0.65	0.08	1.93	0.89	0.92	0.03	183.96	1357.35	3849.27	232.03	200.31	0	4.23	0.54	0	0.18	0	1.81	0.41	10.76
2012 C3 Primadonna	2012	C	3	Primadonna	11.4	0.15	75.8	3.99	85	20.9	16.7	24.6	7.1	22.4	21.8	18.5	24.9	6.4	22.4	52.11	50.36	0.28	102.75	Elution Norm - BG / gFW / RF(ng) / 2h	1.05	3.71	1.55	5.55	0.06	0.43	0.23	3.04	0.67	0.45	0.3	411.67	1545.88	3848.82	74.05	165.93	0	0.67	0.88	0	0.04	0	0.93	0.74	3.86
2012 C3 Scintilla	2012	C	3	Scintilla	11.8	0.3277	35.9	3.45	85	28.4	25	26.4	14.7	28	29.3	26.7	26.8	14	28	55.12	54.95	0.6	110.67	Elution Norm - BG / gFW / RF(ng) / 2h	1.08	3.22	0	3.97	0	0.04	0.75	1.64	1.09	0.83	0.04	8.92	1790.21	3095.81	125.01	124.56	0	2.73	0.65	0.13	0.13	0	0.56	0.36	1.35
2012 H1 Emerald	2012	H	1	Emerald	10	0.7965	12.6	3	93	19.7	25	20.2	19.5	25.8	20.5	26.5	20.8	19.5	26.4	39.27	42.42	0.25	81.94	Elution Norm - BG / gFW / RF(ng) / 2h	1.36	7.96	4.81	5.63	0	0.22	0.2	4.71	1.2	2.15	0.08	0.33	1026.22	4026.08	466.92	204.08	0	0.92	0.75	0	0.17	0	0.79	0.61	2.61
2012 H1 Endura	2012	H	1	Endura	10.5	0.7047	14.9	3	93	17	24.3	18.8	24.3	27.6	17.7	25.8	19.4	24.3	28.2	43.35	43.45	1.23	88.03	Elution Norm - BG / gFW / RF(ng) / 2h	0.89	6.51	0.14	3.58	0	0.31	0.31	3.84	0.61	1.92	0.06	6.64	839.12	4668.91	245.53	173.96	0	0.8	0.55	0.23	0.1	0	1.45	0.97	2.71
2012 H1 Farthing	2012	H	1	Farthing	10.5	0.9518	11	2.83	93	22.1	28.2	20.2	18.9	26.6	22.9	29.7	20.8	18.9	27.2	40.69	41.82	3.1	85.61	Elution Norm - BG / gFW / RF(ng) / 2h	1.63	6.72	0.1	4.54	0	0.1	0.41	3.58	1.09	1.8	0.02	3.59	711.31	3339	330.34	114.56	0	3.16	0.56	0.66	0	0	0.56	0.51	2.08
2012 H1 Meadowlark	2012	H	1	Meadowlark	8.6	0.449	19.2	3.29	93	18.9	23.6	19.7	13	22.2	19.6	25.1	20.4	13	22.8	35.79	39.86	1.5	77.15	Elution Norm - BG / gFW / RF(ng) / 2h	0.96	6.93	4.58	4.53	0	0.14	0.17	2.08	1.2	1.95	0.01	16.09	1679.1	4640.65	455.63	303.32	0	3.82	0.68	0	0.04	0.02	1.07	0.82	15.31
2012 H1 Primadonna	2012	H	1	Primadonna	10.6	0.5214	20.3	3.18	93	27.2	25.5	24	14.1	26	27.9	27	24.6	14.1	26.6	47.39	48.73	1.95	98.07	Elution Norm - BG / gFW / RF(ng) / 2h	2.9	4.71	0.78	5.17	0	0.18	0.19	3.61	0.83	1.21	0.04	82.61	1290.39	4073.93	200.32	154.64	0	0.87	0.79	0	0	0	0.38	0.5	5.44
2012 H1 Scintilla	2012	H	1	Scintilla	10.8	0.6903	15.6	3.11	93	22.2	24.3	21.4	16.1	25.2	22.9	25.8	22	16.1	25.7	49.74	50.24	2.68	102.66	Elution Norm - BG / gFW / RF(ng) / 2h	2.77	3.44	0	2.43	0	0.03	1.07	1.13	0.44	0.87	0	2.08	791.96	1986.64	284.62	127.43	0	0.89	0.31	0.25	0	0	0	0.37	1.12
2012 H2 Emerald	2012	H	2	Emerald	11.3	0.727	15.5	3.12	90	21.5	21.8	20.1	17.2	23.7	22.7	23.8	21.2	17.2	24.8	52.42	49.62	0.37	102.41	Elution Norm - BG / gFW / RF(ng) / 2h	1.29	5.84	1.99	4.88	0.15	0.09	0.17	5	0.78	1.36	0.26	0.21	907.58	3524.46	283.33	146.06	0	0.5	0.87	0	0.11	0.03	1.15	0.66	2.05
2012 H2 Endura	2012	H	2	Endura	10.7	0.6394	16.7	3.03	90	19.1	20.7	19.3	19.9	25.3	20.2	22.6	20.4	19.9	26.3	48.95	44.98	0.55	94.47	Elution Norm - BG / gFW / RF(ng) / 2h	1.07	5.04	4.64	2.27	0.11	0.43	0.23	3.05	0.6	1.36	0.18	11.86	751.25	3958.72	189.72	121.01	0	0.73	0.77	0.19	0.08	0.08	1.99	0.77	2.49
2012 H2 Farthing	2012	H	2	Farthing	11.2	0.8613	13	2.97	90	15.3	25.9	17.7	27.2	26.4	16.4	27.8	18.9	27.2	27.4	48.91	45.96	1.98	96.85	Elution Norm - BG / gFW / RF(ng) / 2h	1.87	5.18	2.52	3.99	0.22	0.09	0.59	3.18	0.65	1.19	0.17	10.66	691.76	2959	319.16	115.3	0	2.35	0.68	0.53	0	0.05	1.07	0.95	1.64
2012 H2 Meadowlark	2012	H	2	Meadowlark	9.9	0.3687	26.8	3.45	90	21.3	24.4	22.4	10.9	23.3	22.4	26.4	23.5	11	24.3	44.44	43.52	2.19	90.15	Elution Norm - BG / gFW / RF(ng) / 2h	1.04	5.26	2.97	4.5	0.2	0.13	0.08	2.22	0.98	1.33	0.15	35.85	1310.42	3943.53	266.34	215.23	0	4.43	0.72	0	0.12	0.08	1.95	0.8	10.81
2012 H2 Primadonna	2012	H	2	Primadonna	12.5	0.5342	23.4	3.34	90	25.5	21.8	25.4	12.6	25.9	26.6	23.8	26.6	12.6	26.9	59.23	57	1.56	117.8	Elution Norm - BG / gFW / RF(ng) / 2h	1.5	3.87	1	4.31	0.15	0.12	0.12	3.5	0.69	0.89	0.27	19.66	938.49	3623.7	216.85	184.12	0	1.64	0.91	0	0.01	0.05	0.91	0.83	3.91
2012 H2 Scintilla	2012	H	2	Scintilla	11.7	0.5863	20	3.19	90	24.6	24.9	24.3	16	27.4	25.8	26.8	25.4	16	28.5	55.43	52.97	1.36	109.76	Elution Norm - BG / gFW / RF(ng) / 2h	3.04	3.3	0	3.04	0.14	0.06	0.03	1.41	0.61	0.75	0.12	5.65	803.68	1647.63	275.75	120.34	0	0.95	0.45	0.25	0.18	0.02	0.33	0.76	0.88
2012 H3 Emerald	2012	H	3	Emerald	11.7	0.5682	20.5	3.13	72	23.9	24.6	24.9	17.4	27.5	24.1	24.9	24.4	16	26.2	55.69	56.95	0.31	112.95	Elution Norm - BG / gFW / RF(ng) / 2h	0.76	4.88	0	4.02	0	0.05	0.17	4.23	0.83	1.19	0.02	0.02	896.3	3156.01	199.62	111.65	0.07	0.2	0.63	0	0	0	0.06	0.2	1.75
2012 H3 Endura	2012	H	3	Endura	10.8	0.711	15.1	2.91	72	19.4	26.9	22.3	26	30.7	19.6	27.2	21.8	24.7	29.5	42.76	42.47	0.99	86.22	Elution Norm - BG / gFW / RF(ng) / 2h	0.81	5.61	0.74	4.01	0	0.3	0.32	3.18	1.52	1.64	0.09	7	852.17	4313.24	192.26	133.5	0.11	0.62	0.52	0.18	0.13	0.02	0.39	0.43	2.33
2012 H3 Farthing	2012	H	3	Farthing	10.9	0.7572	14.4	2.82	72	17.4	28.8	19.3	27.8	28.3	17.7	29	18.8	26.4	27	46.49	45.99	2.2	94.68	Elution Norm - BG / gFW / RF(ng) / 2h	1.63	5.17	0.27	4.19	0	0.07	0.21	3.34	0.48	1.29	0.04	4.25	944.94	3306.15	186.98	85.96	0.08	1.72	0.63	0.42	0	0	0.18	0.56	1.52
2012 H3 Meadowlark	2012	H	3	Meadowlark	10.8	0.2393	45.3	3.63	72	24.9	27.5	27.4	10.8	28	25.1	27.8	26.9	9.4	26.8	49.55	51.26	2.78	103.59	Elution Norm - BG / gFW / RF(ng) / 2h	0.64	4.66	0.23	2.87	0.23	0.24	0.08	1.64	0.57	1.16	0.03	50.42	973.28	2821.44	257.52	166.57	0.21	4.24	0.4	0	0.16	0	0.27	0.58	8.84
2012 H3 Primadonna	2012	H	3	Primadonna	13.9	0.4015	34.6	3.42	72	27.5	22	29	11.2	28.5	27.7	22.3	28.5	9.9	27.2	69.86	67.58	2.06	139.49	Elution Norm - BG / gFW / RF(ng) / 2h	1.52	4.92	0	5.26	0.04	0.28	0.37	3.87	1.92	1.2	0.09	59.65	1031.55	3826.19	240.73	191.51	0.18	1.06	0.82	0	0.04	0	0.3	0.58	2.81
2012 H3 Scintilla	2012	H	3	Scintilla	11.8	0.4021	29.3	3.36	72	25.3	23.5	28.9	14.2	31.9	25.6	23.8	28.4	12.9	30.7	57.5	55.1	3.2	115.8	Elution Norm - BG / gFW / RF(ng) / 2h	3.8	3.44	0	3.33	0.08	0.08	1.71	1.77	0.74	0.85	0.04	9.19	1016.58	2141.76	275.95	130.85	0.25	1.19	0.58	0.28	0	0	0.09	0.47	1.12
2012 W1 Emerald	2012	W	1	Emerald	9.4	0.9849	9.5	3.14	90	17.2	22.9	17.4	24.1	26.6	16.1	24	16.8	24.3	26.4	36.82	36.28	0.27	73.37	Elution Norm - BG / gFW / RF(ng) / 2h	1.11	7.82	4.85	5.21	0.02	0.2	0.15	3.72	0.92	1.56	0.21	0.53	1010.98	3950.6	489.97	183.5	0	0.42	0.94	0	0.06	0	0.75	0.67	1.87
2012 W1 Endura	2012	W	1	Endura	9.2	0.8747	10.5	3.1	90	14.5	22.3	18.3	24.9	26	15.2	23.6	18.3	24.5	25.7	35.86	35.54	0.65	72.06	Elution Norm - BG / gFW / RF(ng) / 2h	1.01	7.29	7.1	4.2	0	0.33	0.21	3.27	0.74	1.77	0.02	5.61	953.13	5203.29	220.25	180.68	0	0.45	0.49	0.31	0.17	0	1.22	0.63	1.82
2012 W1 Farthing	2012	W	1	Farthing	10	0.2276	43.9	3.15	90	23.5	25.3	22.6	9.8	21.8	24.6	26.8	23	9.2	22.3	31.71	32.95	1.01	65.67	Elution Norm - BG / gFW / RF(ng) / 2h	2.74	2.6	0	3.44	0	0.14	0.3	1.91	0.62	0.51	0.01	26.81	844.43	2110.61	282.18	109.06	0	0.13	0.35	0.32	0.09	0	0.98	0.56	1.68
2012 W1 Meadowlark	2012	W	1	Meadowlark	8.2	0.6949	11.8	3.85	90	18.6	25.4	18.1	19.4	23.2	18	26.2	18.1	19.6	23	48.55	42.85	1.25	92.65	Elution Norm - BG / gFW / RF(ng) / 2h	0.82	5.82	0.45	4.67	0	0.11	0.06	1.5	0.99	1.43	0	9.19	1226.64	4095.55	301.9	147.01	0	0.7	0.58	0	0	0	4.09	0.73	6.49
2012 W1 Primadonna	2012	W	1	Primadonna	10.8	0.5573	19.4	3.51	90	25	23.2	25.6	13.7	27.2	26.4	25.8	25.4	12.9	27.5	45.81	43.56	1.84	91.21	Elution Norm - BG / gFW / RF(ng) / 2h	0.7	8.55	6.16	6.58	0	0.14	0.14	4.27	1.7	1.73	0.24	70.53	1157.13	4656.22	397.79	146.09	0	0.29	0.68	0	0.02	0	0.74	0.77	3.71
2012 W2 Emerald	2012	W	2	Emerald	9.7	0.8421	11.5	3.18	91	16.7	27.1	18	25.3	26.7	16.6	27.7	17	24.3	25.5	39.25	40.33	0.49	80.07	Elution Norm - BG / gFW / RF(ng) / 2h	1.01	5.39	0.25	5.45	0	0.14	0.1	4.3	1.32	1.29	0.01	0.07	1131.3	4041.92	342.79	147.25	0.23	1.65	1.05	0	0	0	0.01	0.35	1.7
2012 W2 Endura	2012	W	2	Endura	11.6	0.6036	19.2	3.11	91	26	27.1	26.3	21.5	31.4	25.9	27.8	25.3	20.5	30.3	53.14	52.08	0.3	105.52	Elution Norm - BG / gFW / RF(ng) / 2h	1.03	7.83	0.71	4.99	0.19	0.24	0.26	4.09	0.52	1.99	0.04	8.09	1066.75	5767.6	156.04	138.07	0	1.88	0.6	0.33	0	0.02	0.37	0.54	2.03
2012 W2 Farthing	2012	W	2	Farthing	10.4	0.2108	49.3	3.9	91	18.2	24	21.9	9.8	22.3	18	24.7	20.8	8.8	21.1	42.22	43.6	1.89	87.7	Elution Norm - BG / gFW / RF(ng) / 2h	2.52	2.17	0	3.01	0	0.11	0.25	1.67	0.65	0.51	0	35.01	635.78	1778.24	196.21	81.24	0	1.74	0.31	0.22	0	0	0.36	0.35	2.32
2012 W2 Meadowlark	2012	W	2	Meadowlark	9.4	0.4961	19	3.24	91	21	26.5	22.2	18.9	25.7	20.8	27.1	21.2	17.9	24.6	52.83	47.69	1.48	102	Elution Norm - BG / gFW / RF(ng) / 2h	1.18	5.21	0.17	5.39	0	0.07	0.04	1.8	1.35	1.46	0	6.57	1408.63	4318.67	200.46	118.98	0	4.21	0.67	0	0	0	1.73	0.39	7.33
2012 W2 Primadonna	2012	W	2	Primadonna	12.6	0.4213	29.9	3.62	91	29.7	28	27.5	12.6	28.6	29.5	28.7	26.5	11.6	27.5	59.8	58.44	2.59	120.83	Elution Norm - BG / gFW / RF(ng) / 2h	1.56	7.74	1.59	6.74	0.12	0.18	0.19	4.82	1.1	1.72	0.02	124.88	1341.65	4882.09	252.72	137.75	0	1.72	0.87	0	0.01	0	0.08	0.67	2.83
2012 W3 Emerald	2012	W	3	Emerald	9.2	0.6697	13.7	3.37	79	17.9	22.9	16.9	17	21.7	19.7	25.4	18.9	17.2	23.2	28.84	31.48	0.34	60.66	Elution Norm - BG / gFW / RF(ng) / 2h	0.84	5.22	0.46	5.28	0	0.14	0.25	5.01	1.18	1.21	0.05	0.99	1432.62	4530.73	399.6	190.58	0.06	0	0.91	0	0	0	0.13	0.93	1.79
2012 W3 Endura	2012	W	3	Endura	10.9	0.4415	24.7	3.4	79	19	15.8	19.2	15.5	22.2	20.9	18.3	21.1	15.8	23.7	43.13	42.47	0.83	86.43	Elution Norm - BG / gFW / RF(ng) / 2h	0.75	4.99	0.55	3.65	0.05	0.5	0.18	3.15	1.09	1.22	0.02	16.21	1271.33	4813.79	109.55	136.44	0	0	0.53	0.25	0.03	0	0.16	0.89	1.71
2012 W3 Farthing	2012	W	3	Farthing	9.6	0.19	50.5	3.98	79	19.1	16.5	17.1	6.6	17	20.9	19	19.1	6.9	18.6	45.08	39.68	1.21	85.97	Elution Norm - BG / gFW / RF(ng) / 2h	2.08	1.53	0	3.1	0	0.11	0.23	1.67	0.56	0.37	0.03	38.06	523.33	1465.78	159.61	71.6	2.11	0.02	0.24	0	0.31	0	0.28	0.75	1.53
2012 W3 Meadowlark	2012	W	3	Meadowlark	8.8	0.3239	27.2	3.54	79	12.4	21.4	16.3	15.5	19.4	14.3	23.9	18.2	15.7	21	39.44	40.85	1.46	81.75	Elution Norm - BG / gFW / RF(ng) / 2h	1.23	4.77	0.11	4.74	0.49	0.4	0.05	2.43	0.74	1.15	0.05	99.3	1570.66	4431.08	228.73	156.44	0.02	2.83	0.66	0	0.11	0	1.4	0.59	9.76
2012 W3 Primadonna	2012	W	3	Primadonna	10.7	0.4012	26.7	3.46	79	22.1	22.7	21.1	13.2	24.1	24	25.1	23.1	13.5	25.7	39.56	41.63	1.42	82.61	Elution Norm - BG / gFW / RF(ng) / 2h	1.23	6.8	0	7.15	0	0.27	0.06	5.4	1.18	1.52	0.06	142.77	1628.91	5600.5	260.7	146.9	0	1.09	0.97	0	0.07	0	0.57	1.02	3.24
2013 C1 Emerald	2013	C	1	Emerald	10.5	0.6161	17.1	3.23	95	17	22.8	19.2	18.8	23.4	18.6	24.2	19.1	19.6	23.9	43.3	56.37	1.88	101.55	Elution Norm - BG / gFW / RF(ng) / 2h	1.11	5.38	7.26	5.03	0.07	0.13	0.17	3.71	0.83	1.24	0.19	0.11	1193.31	3873.85	278.03	200.88	1.46	1.49	0.69	0	0.11	0	0	1.88	2.42
2013 C1 Endura	2013	C	1	Endura	12.7	0.4063	31.3	3.49	95	22.3	23.2	24.1	14.1	25.6	23.9	24.6	24	14.9	26.2	58.77	63.56	5.44	127.77	Elution Norm - BG / gFW / RF(ng) / 2h	0.87	6.14	10.99	3.19	0.4	0.63	0.6	3.16	0.82	1.54	0.18	4.7	552.17	3361.91	449.83	280.1	5.05	1.01	0.31	0.2	0.53	0.06	0	0.99	1.8
2013 C1 Farthing	2013	C	1	Farthing	10.5	0.5176	20.3	3.35	95	22.8	26.7	21.8	19.1	24.9	24.5	28.1	21.7	19.9	25.4	47.93	51.45	4.96	104.33	Elution Norm - BG / gFW / RF(ng) / 2h	1.74	4.05	2.41	4.67	0.1	0.07	0.34	2.89	0.75	0.91	0.16	2.03	1164.31	3223.95	242.07	173.36	9.89	1.27	0.61	0.37	0.18	0	0	1.47	1.7
2013 C1 Meadowlark	2013	C	1	Meadowlark	10.5	0.1921	54.7	3.82	95	25	27.1	24.4	8.2	23.8	26.6	28.5	24.3	9.1	24.3	47.05	58.31	4.41	109.77	Elution Norm - BG / gFW / RF(ng) / 2h	0.56	4.81	6.74	4.39	0.61	0.16	0.14	1.57	1.07	1.14	0.15	2.68	1236.98	3249.85	194.27	210.96	0.5	6.45	0.5	0	0.33	0	0	3.52	10.4
2013 C1 PrimaDonna	2013	C	1	Primadonna	12.4	0.1719	72.1	4.11	95	22.8	18.7	25.7	6.5	24.7	24.4	20.1	25.6	7.3	25.3	60.56	65.96	4.7	131.22	Elution Norm - BG / gFW / RF(ng) / 2h	0.43	4.12	4.11	3.44	0.07	0.16	0.12	2.42	0.66	0.88	0.12	39.61	785.78	2679.01	175.67	155	1.33	0.46	0.41	0	0.19	0	0	0.8	4.82
2013 C1 Scintilla	2013	C	1	Scintilla	12	0.4366	27.5	3.44	95	25.4	26.1	26	16	28.8	27	27.5	25.9	16.8	29.3	53.99	59.33	5.65	118.97	Elution Norm - BG / gFW / RF(ng) / 2h	0.98	4.91	5.67	4.31	0.12	0.05	0.54	1.93	0.88	1.14	0.16	0.42	1033.02	2341.95	259.5	184.44	6.36	1.82	0.65	0.2	0.04	0.01	0	1.05	1.15
2013 C2 Emerald	2013	C	2	Emerald	10.9	0.3856	28.3	3.62	88	24	25.5	21.9	14.2	25	24.8	25.8	21.9	14.8	25	48.81	57.12	2.2	108.14	Elution Norm - BG / gFW / RF(ng) / 2h	1.42	4.63	14.23	5.19	0	0.07	0.36	3.3	0.74	1.06	0.21	0.53	1237.81	3606.61	170.62	152.08	0	1.2	0.69	0	0	0	0	1.04	2.3
2013 C2 Endura	2013	C	2	Endura	11.7	0.3891	30.1	3.49	88	26.3	27.7	24.8	16.6	29.1	27.1	28	24.8	17.2	29	56.81	58.74	4.27	119.83	Elution Norm - BG / gFW / RF(ng) / 2h	0.96	6.5	13.15	5	0.12	0.37	0.3	4.21	0.92	1.59	0.21	3.92	1005.92	4796.29	247.48	227.82	5.03	0.99	0.58	0.28	0.26	0	0	0.64	2.2
2013 C2 Farthing	2013	C	2	Farthing	10.6	0.3649	29	3.46	88	26.1	29.9	25.7	16.4	28.7	26.9	30.2	25.7	17	28.7	47.77	52.63	5.14	105.55	Elution Norm - BG / gFW / RF(ng) / 2h	2.85	3.39	5.91	5.42	0.02	0.06	0.28	2.59	0.71	0.73	0.2	5.44	1336.43	3036.12	184.12	154.46	9.74	1.3	0.67	0.35	0	0	0	0.74	1.52
2013 C2 Meadowlark	2013	C	2	Meadowlark	9.9	0.1994	49.7	3.78	88	23.8	27.8	26.1	9.3	26.4	24.6	28.1	26.1	10	26.4	45.83	57.53	4.29	107.65	Elution Norm - BG / gFW / RF(ng) / 2h	0.62	5.01	3.48	4.69	0	0.15	0.06	1.96	0.7	1.14	0.16	4.08	1517.71	3920.81	162.92	179.29	0.77	5.7	0.62	0	0.15	0	0	1.8	11.79
2013 C2 PrimaDonna	2013	C	2	Primadonna	11.6	0.1291	89.9	4.41	88	20	17.2	26.2	5.9	25.6	20.8	17.5	26.2	6.6	25.6	52.55	55.91	5.05	113.51	Elution Norm - BG / gFW / RF(ng) / 2h	1.51	3.21	4.47	3.34	0	0.26	0.21	2.03	0.44	0.55	0.11	191.1	586.74	2303.55	103.49	82.28	1.6	0.17	0.31	0	0.07	0	0	0.27	5
2013 C2 Scintilla	2013	C	2	Scintilla	12.4	0.3533	35.1	3.51	88	30.7	29	29.2	13.2	30.7	31.5	29.3	29.2	13.8	30.7	60.04	63.17	5.69	128.91	Elution Norm - BG / gFW / RF(ng) / 2h	1.47	4.7	9.89	4.72	0.09	0.05	0.74	2.28	0.75	1.02	0.2	0.99	1442.64	3093.42	256.8	155.66	7.64	2.45	0.79	0.17	0	0	0	0.58	1.42
2013 C3 Emerald	2013	C	3	Emerald	9.8	0.2993	32.7	3.58	93	17.3	18.2	17.7	11.1	20.1	18.8	19.9	18.5	11.8	21.1	42.54	56.3	1.25	100.09	Elution Norm - BG / gFW / RF(ng) / 2h	1.17	4.82	9.45	4.99	0	0.05	0.31	3.17	0.74	1.06	0.22	0.89	1187.58	3417.91	175.07	149.54	0	1.16	0.65	0	0.1	0	0	1.56	2.55
2013 C3 Endura	2013	C	3	Endura	11.3	0.2142	52.6	3.73	93	22.3	20.8	23.4	10.2	24.5	23.8	22.5	24.3	10.9	25.5	50.1	61.41	3.94	115.44	Elution Norm - BG / gFW / RF(ng) / 2h	1.01	4.52	8.49	3.14	0.19	0.33	0.38	2.71	0.5	1.03	0.15	7.88	751.14	3255.02	147.36	135.78	3.11	0.5	0.28	0.21	0.25	0	0	0.87	2.04
2013 C3 Farthing	2013	C	3	Farthing	11	0.2305	47.6	3.7	93	25.1	23	23.2	9.1	23.5	26.6	24.7	24	9.8	24.4	55.48	59.56	4.54	119.58	Elution Norm - BG / gFW / RF(ng) / 2h	2.54	2.66	8.18	2.79	1.66	0.11	0.63	1.42	0.71	0.55	0.13	19.15	500.47	1524.41	277.55	168.16	5.01	0.98	0.2	0.12	0.13	0	0	0.93	1.96
2013 C3 Meadowlark	2013	C	3	Meadowlark	10.2	0.2293	44.5	3.61	93	21.5	24.3	23.8	11.8	23	23	26	24.7	12.5	23.9	47.31	58.57	3.67	109.55	Elution Norm - BG / gFW / RF(ng) / 2h	0.98	4.7	28.68	4.36	0.18	0.37	0.25	1.79	0.84	1.06	0.14	57.09	866.14	2912.72	253.1	215.25	0	4.39	0.27	0	0.12	0	0	0.81	8.29
2013 C3 PrimaDonna	2013	C	3	Primadonna	11.6	0.1988	58.4	3.94	93	15.6	12.9	22.5	9.1	21.9	17.1	14.6	23.4	9.8	22.9	53.91	60.63	3.65	118.19	Elution Norm - BG / gFW / RF(ng) / 2h	1.92	4.8	7.1	3.71	0.09	0.36	0.76	2.41	0.55	0.95	0.15	191.43	631.56	2715.29	175.81	140.28	2.48	0.78	0.38	0	0.08	0	0	0.75	4.59
2013 C3 Scintilla	2013	C	3	Scintilla	12.2	0.365	33.4	3.4	93	25.5	23.1	27.3	11.9	25.9	27	24.8	28.1	12.6	26.8	55.56	63.51	5.19	124.25	Elution Norm - BG / gFW / RF(ng) / 2h	1.12	5.25	11.37	4.49	0.08	0.03	0.95	1.83	0.67	1.17	0.18	2.25	1105.07	2527.2	245.6	149.16	7.25	2.32	0.54	0.16	0	0	0	0.61	1.05
2013 H1 Emerald	2013	H	1	Emerald	12.2	0.7874	15.5	3.14	90	21.7	29.1	24	18.2	29.9	22.6	30	24.1	19.2	30.1	51.93	55.07	0.4	107.41	Elution Norm - BG / gFW / RF(ng) / 2h	0.53	5.51	4.17	3.87	0.12	0.59	0.17	3.54	0.71	1.25	0.11	0.24	903.31	3247.38	377.35	175.86	1.67	1.35	0.62	0	0.3	0	0.15	1.31	1.46
2013 H1 Endura	2013	H	1	Endura	10.7	0.8149	13.1	2.99	90	17.9	25	19.1	24.1	26.7	18.8	25.8	19.3	25.1	26.9	43.4	45.26	0.79	89.45	Elution Norm - BG / gFW / RF(ng) / 2h	0.36	5.36	18.29	3.08	0.15	0.51	0.22	2.79	0.59	1.25	0.06	3.81	799.3	3436.66	225.07	164.54	1.92	0.9	0.39	0.14	0.22	0.1	0.18	1.49	1.79
2013 H1 Farthing	2013	H	1	Farthing	11	0.7811	14.1	3.04	90	21.5	29.3	20.2	21.4	28.5	22.4	30.2	20.4	22.4	28.7	49.6	48.79	2.04	100.43	Elution Norm - BG / gFW / RF(ng) / 2h	0.82	4.37	8.58	4.59	0.48	0.17	2.31	3.1	0.6	0.93	0.12	4	1094.82	3122.36	208.74	116.5	5.87	2.12	0.53	0.29	0.08	0	0.17	1.73	1.02
2013 H1 Meadowlark	2013	H	1	Meadowlark	8.1	0.5111	15.8	3.38	90	17.5	25.6	18.3	13.1	21.9	18.4	26.4	18.4	14	22.1	28.4	34.25	1.37	64.02	Elution Norm - BG / gFW / RF(ng) / 2h	0.43	4.93	4.28	5.74	0.69	0.52	0.07	2.36	1.09	1.21	0.13	1.36	1460.5	3855.59	315	193.44	1.17	2.14	0.72	0	0.39	0	1.2	1.97	11.07
2013 H1 PrimaDonna	2013	H	1	Primadonna	11.2	0.3941	28.4	3.47	90	27.2	27.3	25.3	11.7	26.1	28.1	28.2	25.4	12.6	26.3	50.13	49.46	1.42	101.01	Elution Norm - BG / gFW / RF(ng) / 2h	0.46	3.9	6.49	4.25	0.07	0.25	0.17	3.02	0.72	0.84	0.07	20.68	1077.9	3292.86	219.12	172.17	1.55	1.4	0.62	0	0.17	0	0.31	1.4	4.74
2013 H1 Scintilla	2013	H	1	Scintilla	11.4	0.6331	18	3.27	90	30.1	29.1	27.7	14.5	30.6	31	30	27.8	15.5	30.7	51.74	51.04	2.06	104.85	Elution Norm - BG / gFW / RF(ng) / 2h	0.5	4.02	2.25	3.62	0.09	0.16	0.49	1.88	0.57	0.9	0.1	0.29	1117.58	2436.79	282.95	134.6	5.35	2.07	0.54	0.2	0.07	0	0.13	0.68	1.11
2013 H2 Emerald	2013	H	2	Emerald	13.1	0.9096	14.4	2.99	95	18.6	23.9	20.8	20.1	26.5	19.9	25.2	21	20.5	27.3	64.02	76.01	0.32	140.36	Elution Norm - BG / gFW / RF(ng) / 2h	1.54	7.31	9.78	5.64	0.24	0.21	0.4	4.69	0.71	1.77	0.15	0.18	674.27	3656.68	353.07	153.96	0.81	1.71	0.59	0	0.02	0	0	1.15	2.78
2013 H2 Endura	2013	H	2	Endura	10.9	0.9463	11.6	2.93	95	14.9	25.3	16.4	28.1	27	16.2	26.6	16.6	28.6	27.7	50.56	61.03	0.7	112.29	Elution Norm - BG / gFW / RF(ng) / 2h	0.94	5.61	2.84	3.73	0.12	0.15	0.17	3.41	0.45	1.38	0.14	2.49	620.1	3863.37	137.66	99.37	2.4	0.64	0.43	0.17	0.07	0	0	0.75	1.99
2013 H2 Farthing	2013	H	2	Farthing	11.9	0.8233	14.5	2.93	95	21.4	27.6	20.3	24.5	26.5	22.6	28.8	20.5	24.9	27.2	52.59	60.41	2.09	115.1	Elution Norm - BG / gFW / RF(ng) / 2h	1.86	5.53	8.99	4.65	0.14	0.03	0.37	3.34	0.83	1.2	0.13	2.18	789.02	3061.57	283.81	115.95	6.88	1.99	0.52	0.33	0	0	0	1.2	1.41
2013 H2 Meadowlark	2013	H	2	Meadowlark	9.7	0.5736	16.9	3.12	95	24.3	26	22.8	15.9	25.5	25.6	27.2	23	16.4	26.2	39.47	55.13	1.99	96.59	Elution Norm - BG / gFW / RF(ng) / 2h	0.8	4.19	2.34	4.41	0.78	0.06	0.07	1.34	0.74	0.88	0.1	2.73	878.65	2620.06	200.81	160.73	0.52	2.88	0.51	0	0.08	0	0	2.32	9
2013 H2 PrimaDonna	2013	H	2	Primadonna	11.1	0.4394	25.3	3.55	95	23.8	23.7	23	12.4	24.3	25	25	23.2	12.9	25	49.53	57.93	1.86	109.32	Elution Norm - BG / gFW / RF(ng) / 2h	2.87	5.72	4.14	4.89	0.17	0.12	0.41	2.78	0.73	1.2	0.15	12.88	1246.52	3568.99	266.4	183.66	1.27	0.8	0.58	0	0.06	0	0	1.27	7.34
2013 H2 Scintilla	2013	H	2	Scintilla	11.8	0.6237	18.9	3.24	95	29.3	27.9	27.2	16.4	29.4	30.5	29.2	27.4	16.9	30.1	54.42	63.93	1.93	120.28	Elution Norm - BG / gFW / RF(ng) / 2h	2.7	3.26	5.43	3.68	0.16	0	0.82	1.48	0.5	0.7	0.13	0.38	994.81	2459.24	257.2	126.23	8.87	3.07	0.57	0.25	0	0	0	0.51	1.72
2013 H3 Emerald	2013	H	3	Emerald	12.3	0.359	34.2	3.53	95	20.1	20.4	23.5	10.6	23.8	23.8	24.1	25.7	11.9	26.3	61.59	59.39	0.56	121.54	Elution Norm - BG / gFW / RF(ng) / 2h	0.86	5.16	11.62	4.5	0.02	0.05	0.27	3.81	0.71	1.19	0.24	0.2	983.09	3244.08	209.91	135.64	0	0.89	0.54	0	0	0	0	1.4	2.28
2013 H3 Endura	2013	H	3	Endura	10.1	0.4485	22.5	3.19	95	17.4	19.3	20.1	20.4	23.9	21	23	22.3	21.7	26.3	45.47	43.61	1.09	90.16	Elution Norm - BG / gFW / RF(ng) / 2h	0.71	3.87	23.48	3.25	0.07	0.22	0.24	2.64	0.46	0.88	0.16	5.06	722.37	3197.75	89.76	89.25	2.34	0.41	0.32	0	0	0	0	0.96	1.86
2013 H3 Farthing	2013	H	3	Farthing	11.4	0.5255	21.7	3.25	95	24.2	23.3	22.4	14.7	25.5	27.8	27	24.6	16.1	27.9	56.36	50.93	2.25	109.54	Elution Norm - BG / gFW / RF(ng) / 2h	1.67	4.24	9.12	4.12	0.14	0.07	0.31	2.43	0.61	0.87	0.14	7.5	817.05	2362.49	194.79	112.93	5.96	1.7	0.36	0.18	0	0	0	0.84	1.39
2013 H3 Meadowlark	2013	H	3	Meadowlark	9	0.3935	22.9	3.43	95	18.4	21.2	19.1	13.4	22.2	22.1	24.9	21.3	14.7	24.7	41.06	45.03	2.03	88.13	Elution Norm - BG / gFW / RF(ng) / 2h	0.86	4.39	7.48	4.35	0.26	0.14	0.11	1.92	0.8	1.08	0.18	12.14	986.21	2991.3	215.76	173.35	0	2.01	0.4	0	0.14	0	0	3.01	7.87
2013 H3 Scintilla	2013	H	3	Scintilla	11.8	0.7207	16.4	3.06	95	22.9	24.4	22.9	19.9	26.4	26.6	28.1	25.1	21.2	28.8	64.84	57.68	3.96	126.47	Elution Norm - BG / gFW / RF(ng) / 2h	1.19	4.83	3.56	4.42	0.15	0.06	0.86	1.93	0.7	1.06	0.2	0.61	996.2	2612.62	266.04	127.6	6.02	1.9	0.45	0.18	0	0	0	1.1	1.09
2013 W1 Emerald	2013	W	1	Emerald	11.1	0.7267	15.3	3.32	87	20	23.7	20	16.7	22.5	21.2	25.3	20	17.4	22.9	47.17	59.6	1.86	108.63	Elution Norm - BG / gFW / RF(ng) / 2h	0.84	5.88	9.91	7.45	0.17	0.34	0.12	4.94	1.49	1.34	0.09	0.11	1807.42	4816.67	334.85	206.16	0.56	0.84	1.2	0	0.11	0	0.17	2	1.42
2013 W1 Endura	2013	W	1	Endura	9.9	0.5366	18.4	3.38	87	21	22.1	21	17.6	25.5	22.1	23.7	21	18.4	26	41.37	51.12	2.47	94.96	Elution Norm - BG / gFW / RF(ng) / 2h	0.94	5.94	4.72	4.72	0.16	0.43	0.22	3.48	0.72	1.34	0.08	9.6	1290.74	4756.02	288.55	259.32	4.95	0.9	0.54	0.51	0.47	0.06	0.16	1.02	1.75
2013 W1 Farthing	2013	W	1	Farthing	9.4	0.694	13.5	3.18	87	17.2	23.4	18.4	19.6	22.4	18.4	25	18.4	20.3	22.8	44.62	47.3	3.93	95.86	Elution Norm - BG / gFW / RF(ng) / 2h	1.35	4.42	2.5	6.53	0.03	0.09	0.12	3.96	0.68	1	0.11	1.08	1688.29	4950.3	161.26	105	7.72	1.29	1.12	0.43	0.03	0	0.24	2	1.36
2013 W1 Meadowlark	2013	W	1	Meadowlark	9.7	0.3779	25.6	3.48	87	19.5	25	21.6	14.2	23.4	20.7	26.6	21.6	14.9	23.9	46.58	54.2	4.24	105.01	Elution Norm - BG / gFW / RF(ng) / 2h	1.01	4.85	2.2	6.04	0.91	0.25	0.11	1.59	1.43	1.18	0.15	14.3	2058.22	3857.5	254.1	215.46	0.89	4.3	0.82	0	0.62	0	4.12	4.6	8.64
2013 W1 PrimaDonna	2013	W	1	Primadonna	11.2	0.3911	28.6	3.52	87	25.1	20.4	23.7	11.6	24.1	26.2	22	23.7	12.4	24.6	55.05	65.51	4.06	124.63	Elution Norm - BG / gFW / RF(ng) / 2h	1.08	5.33	4.17	6.91	0	0.24	0.13	4	0.99	1.18	0.13	46.43	1693.21	4585.98	245.55	138.16	1.73	0.83	0.83	0.08	0.35	0.01	0.44	3.07	3.97
2013 W2 Emerald	2013	W	2	Emerald	10.9	0.3855	29.1	3.71	85	23.9	24.8	22.9	11.7	24	25.6	25.6	23.9	12.8	25	45.31	41.19	1.17	87.67	Elution Norm - BG / gFW / RF(ng) / 2h	1.3	6.14	10.28	5.87	0.08	0.19	0.17	3.95	1.01	1.36	0.14	0.23	1265.61	3358.34	317.15	182.92	0.29	0.68	0.72	0	0.25	0	0	1.21	2
2013 W2 Endura	2013	W	2	Endura	9.3	0.6045	15.3	3.28	85	17.5	21.5	19.5	19.9	25.6	19.1	22.3	20.6	20.9	26.6	34.72	33.75	0.33	68.8	Elution Norm - BG / gFW / RF(ng) / 2h	1.21	4.89	26.83	3.88	0.14	0.13	0.17	2.65	0.68	1.21	0.11	4.07	796.18	3828.51	132.51	135.27	2.74	0.62	0.49	0.32	0.15	0	0	1.01	1.55
2013 W2 Farthing	2013	W	2	Farthing	9.6	0.571	16.8	3.23	85	19.7	23.2	20.4	14.7	24.9	21.4	24	21.4	15.8	25.9	39.21	36.61	3.41	79.23	Elution Norm - BG / gFW / RF(ng) / 2h	2.59	4.26	9.8	4.3	0.15	0.07	0.36	2.73	0.65	0.97	0.14	1.71	845.24	2764.46	313.42	135.45	9.09	0.66	0.52	0.55	0.1	0	0	1.09	1.38
2013 W2 Meadowlark	2013	W	2	Meadowlark	9.5	0.3089	30.8	3.72	85	24.9	26.6	24.4	11.5	26.1	26.6	27.4	25.5	12.5	27.1	45.17	47.87	3.6	96.64	Elution Norm - BG / gFW / RF(ng) / 2h	1.08	3.94	22.13	3.79	0.04	0.15	0.13	1.4	0.81	0.93	0.1	12.41	988.6	2756.45	179.42	172.66	0	3.53	0.32	0	0.28	0	0	2.2	8
2013 W2 PrimaDonna	2013	W	2	Primadonna	12.3	0.3257	37.8	3.67	85	24.8	21.6	25.9	8.2	25.2	26.5	22.4	27	9.3	26.1	63.57	60.39	4.68	128.64	Elution Norm - BG / gFW / RF(ng) / 2h	1.72	5.88	6.93	5.93	0	0.15	0.12	3.68	0.74	1.17	0.08	45.02	1409.62	4255.75	133.87	99.99	1.18	0.7	0.79	0	0	0	0	1.93	3.47
2013 W3 Emerald	2013	W	3	Emerald	10.2	0.277	36.8	4.03	90	16.6	18.6	17.5	8.3	18.5	19	21.1	19.2	8.8	20.3	45.37	51.03	1.22	97.63	Elution Norm - BG / gFW / RF(ng) / 2h	1.02	4.8	1.32	4.8	0	0.07	0.25	3.43	0.81	1	0	1.52	1076.05	2997.96	259.16	156.55	0	0.57	0.6	0	0	0	0	1.93	2.41
2013 W3 Endura	2013	W	3	Endura	9.1	0.6169	14.8	3.14	90	14.2	19.8	17.3	24.1	23.6	16.7	22.4	19	24.6	25.4	36.57	43.92	0.78	81.27	Elution Norm - BG / gFW / RF(ng) / 2h	1.17	5.99	4.11	4.47	0	0.26	0.15	3.58	0.73	1.42	0	10.4	1339.65	5331.75	144.02	171.08	3.61	0.68	0.62	0.29	0.15	0	0	1.99	2.29
2013 W3 Farthing	2013	W	3	Farthing	10.2	0.2506	40.7	3.83	90	20.6	20.9	20.9	6.5	21.6	23	23.5	22.6	7.1	23.5	42.93	48.5	3.71	95.14	Elution Norm - BG / gFW / RF(ng) / 2h	1.83	2.99	0.44	3.77	0	0.05	0.3	2.22	0.57	0.7	0	11.43	738.66	2103.74	185.17	104.56	7.02	0.57	0.34	0.39	0.15	0	0	0.88	1.45
2013 W3 Meadowlark	2013	W	3	Meadowlark	9.1	0.1689	53.9	4.12	90	16.8	18.5	20.6	8.6	20.9	19.2	21.1	22.3	9.2	22.7	39.11	48.36	2.55	90.01	Elution Norm - BG / gFW / RF(ng) / 2h	1.01	3.09	4.74	2.75	0.03	0.66	0.18	1.36	0.58	0.66	0	128.38	739.44	2325.87	158.94	158.79	0	2.27	0.31	0	0.37	0	0	1.62	10.47
2013 W3 PrimaDonna	2013	W	3	Primadonna	10.3	0.281	36.7	3.84	90	20	14.6	23.5	9.8	24.7	22.4	17.2	25.2	10.3	26.5	46.73	54.33	2.54	103.59	Elution Norm - BG / gFW / RF(ng) / 2h	1.67	5.41	4.99	5.82	0	0.46	0.18	3.11	0.88	1.11	0	371.24	1557.86	3746.51	158.67	139.72	1.39	0.88	0.75	0	0.13	0	0	1.45	3.68
2014 A1 Chickadee	2014	A	1	Chickadee	11.6	0.2466	46.9	3.73	109	24.7	30.5	26.3	16.3	29.3	23.3	28.3	25.2	15.8	27.5	50.26	47.85	1.79	99.9	Elution Norm - BG / gFW / RF(ng) / 2h	4.31	6.18	3.36	5.68	0.1	0.26	0.66	2.72	1.07	1.23	0.53	0.51	1705.57	3412.52	643.42	343.99	0.28	1.06	0.71	0	0	0	0	0	0.76
2014 A1 Flicker	2014	A	1	Flicker	10.2	0.5885	17.3	3.09	109	11	27.1	14.8	33.5	28.7	9.7	24.9	13.7	33	26.9	58.03	54.04	1.46	113.54	Elution Norm - BG / gFW / RF(ng) / 2h	0.37	8.54	13.1	13.09	0.13	0.16	0.24	5.12	2.9	2.04	0.71	0.58	2789.67	8127.03	135.7	109.8	5.38	3.86	1.32	0	0	0	0	18.98	1.2
2014 A1 Kestrel	2014	A	1	Kestrel	11.7	0.3643	32	3.41	109	25.1	32	24.3	23.5	33.5	23.8	29.9	23.3	23	31.7	40.28	39.32	3.35	82.96	Elution Norm - BG / gFW / RF(ng) / 2h	2.53	17.98	15.29	12.72	0.34	0.16	0.76	7.11	1.81	3.97	0.73	1.49	2719.39	8351.9	619.08	333.54	5.97	3.14	1.91	0.11	0	0.37	0	1	2.31
2014 A1 Vireo	2014	A	1	Vireo	11.2	0.5751	19.5	3.09	109	7.9	29.9	13.8	36.9	29.8	6.6	27.7	12.8	36.4	28	54.42	51.6	2.37	108.39	Elution Norm - BG / gFW / RF(ng) / 2h	1.52	9.26	7.56	11.59	0.04	0.03	0.24	4.44	2.12	2.16	0.62	1	2876.78	7360	161.03	149.49	7.02	4.37	1.17	0.08	0.07	0	0	7.02	0.88
2014 A2 01-25	2014	A	2	FL01-25	10	0.1691	59	3.78	106	21	24.3	21	18	24.6	20.4	23.4	20.9	18	24	48.63	45.97	0.52	95.12	Elution Norm - BG / gFW / RF(ng) / 2h	0.9	7.92	2.56	7.73	0	0.58	0	5.03	1.18	1.51	0.55	18.22	2065.04	6641.36	299.73	204.66	1.31	3.23	2.27	0	0	0	0	2.12	4.14
2014 A2 06-435	2014	A	2	FL06-435	11.6	0.4524	25.6	3.29	106	27.7	25.5	25	13.6	27	27	24.6	24.9	13.6	26.4	51.78	54.55	4.69	111.03	Elution Norm - BG / gFW / RF(ng) / 2h	0.92	9.95	2.52	7.55	0	2.05	0.73	3.73	1.08	1.91	0.4	9.76	1630.76	5273.42	538.72	242.15	10	1.96	1.97	0	0.8	0.03	0	0.29	1.79
2014 A2 06-571	2014	A	2	FL06-571	12	0.1268	94.4	3.93	106	26.1	28.5	25.1	10.4	28.1	25.4	27.5	25	10.4	27.5	58.99	55.04	5.49	119.52	Elution Norm - BG / gFW / RF(ng) / 2h	2.11	7.44	1.45	4.17	0.13	1.27	0.6	3.82	0.59	1.62	0.59	3.3	629.81	3763.62	675.88	169.36	1.69	0.72	1.55	0	0	0.13	0	0	2.14
2014 A2 07-290	2014	A	2	FL07-290	11.6	0.4898	23.6	3.07	106	19.3	27	21.3	20.2	27.5	18.6	26.1	21.2	20.2	26.9	52.44	52.73	5.43	110.61	Elution Norm - BG / gFW / RF(ng) / 2h	2.69	5.28	2.61	5.25	0.17	0.23	0.73	3.63	0.6	1	0.76	2.14	1135.74	5392.34	328.96	197.33	13.82	0.27	1.52	0	0.66	0.27	0	0.19	1.11
2014 A2 Windsor	2014	A	2	Windsor	10.9	0.8629	12.7	2.95	106	6.6	27.2	12.1	32.7	26.4	6	26.3	12	32.7	25.8	45.53	43.13	0.66	89.32	Elution Norm - BG / gFW / RF(ng) / 2h	0.53	10.67	6.57	15.06	0	0.2	0.15	4.98	2.7	2.26	0.68	0.98	3172.9	8271.21	143.75	137.43	9.77	4.08	2.24	0	0.21	0	0	31.41	0.78
2014 A3 06-510	2014	A	3	FL06-510	10.2	0.2495	40.9	3.58	108	22.9	24.2	23	16.3	26.9	20.2	20.5	20.2	14.8	23.6	42.82	45.4	2.17	90.38	Elution Norm - BG / gFW / RF(ng) / 2h	1.16	7.69	0.13	5.73	0.1	0.05	0.28	3.04	0.95	1.62	0.69	2.03	2085.7	5658.26	876.68	286.72	1.09	0.69	1.2	0	0	0	0	0.26	1.79
2014 A3 08-022	2014	A	3	FL08-022	12	0.1666	72.1	3.89	108	17.9	22.4	23.9	12.5	24	15.2	18.7	21.2	10.9	20.6	53.84	48.74	2.41	104.99	Elution Norm - BG / gFW / RF(ng) / 2h	2.26	23.69	0	12.56	0.29	0.14	0.38	6.2	1.29	5.39	0.8	10.52	1276.58	5985.96	901.03	331.5	1.85	1.55	0.86	0	0	0	0	0	2.56
2014 A3 10-107	2014	A	3	FL10-107	11.5	0.5136	22.4	3.25	108	13.9	25.1	19.5	26	27.7	11.3	21.4	16.7	24.4	24.3	46.49	45.38	0.06	91.93	Elution Norm - BG / gFW / RF(ng) / 2h	1.77	16.61	0.09	10.79	0	0	0.6	5.49	1.83	4.03	0.94	0.22	1932.85	6334.82	725.46	268.07	2.07	2.22	1.51	0	0	0	0	0.28	3.01
2014 A3 10-186	2014	A	3	FL10-186	11.5	0.1798	64	3.85	108	28.7	32.1	28.2	10.9	28	26	28.4	25.5	9.4	24.6	51.95	45.82	1.67	99.43	Elution Norm - BG / gFW / RF(ng) / 2h	2.07	10.52	2.16	9.98	2.5	0	0.03	1.97	1.81	2.01	0.88	0.41	3644.08	354.49	25.83	146.68	1.59	0.87	1.16	0.5	0	0	0	5.01	3.87
2014 C1 Emerald	2014	C	1	Emerald	10.5	0.2709	38.8	3.56	95	25	25	24	12.4	26.3	24.1	23.5	23.9	11.8	25.3	45.64	46.3	0.13	92.07	Elution Norm - BG / gFW / RF(ng) / 2h	0.96	5.79	2.24	8.48	0	0	0	4.52	1.08	0.98	0.53	0.15	1293.3	4524.94	282.31	169.46	0	1.3	0.92	0	0	0	0	5.45	1.45
2014 C1 Endura	2014	C	1	Endura	11.2	0.2164	51.8	3.61	95	23	25	22.9	18.5	26.1	22.2	23.5	22.9	18	25.1	45.7	47.44	0.17	93.31	Elution Norm - BG / gFW / RF(ng) / 2h	1.47	6.01	2.09	5.24	0	0.54	0.28	3.51	0.82	1.04	0.68	8.15	1053.59	5055.05	387.58	258.25	3.33	1.56	0.36	0.13	0.57	0.08	0	2.46	1.91
2014 C1 Farthing	2014	C	1	Farthing	10.9	0.1691	64.2	3.84	95	26.1	27.3	25.6	10.4	26.2	25.3	25.8	25.5	9.9	25.1	47.22	46.81	0.09	94.12	Elution Norm - BG / gFW / RF(ng) / 2h	1.95	5.49	9.54	6.82	0.62	0.29	0.38	3.69	0.41	0.6	0.6	21.21	1093.73	3913.71	465.57	219.75	9.13	3.15	0.67	0	0	0	0	0.89	1.51
2014 C1 Meadowlark	2014	C	1	Meadowlark	10.2	0.1578	64.4	3.9	95	27.3	29.5	24.7	10.2	25.9	26.5	28	24.6	9.6	24.9	44.68	48.7	0.04	93.43	Elution Norm - BG / gFW / RF(ng) / 2h	0.41	5.21	2.02	7.31	0.64	0.24	0	2.69	1.24	1.01	0.73	3.63	1666.59	4405.92	329.73	278.6	0	8.53	0.74	0	0.42	0	0	11.23	5.9
2014 C1 Primadonna	2014	C	1	Primadonna	11.1	0.2812	39.5	4.06	95	24.6	23.3	22.6	11	24	23.7	21.7	22.6	10.5	23	49.94	47.18	0.22	97.35	Elution Norm - BG / gFW / RF(ng) / 2h	0.86	4.56	2.06	10.51	0	0.66	0	4.65	1.29	0.74	0.65	58.79	1277.8	4409.49	296.21	183.53	0.21	1.01	0.79	0	0	0	0	17.04	2.57
2014 C1 Scintilla	2014	C	1	Scintilla	11.9	0.2487	47.8	3.51	95	32.1	28.6	28.3	13.3	29.1	31.3	27.1	28.2	12.8	28	52.56	53.91	0.55	107.02	Elution Norm - BG / gFW / RF(ng) / 2h	0.87	2.87	1.88	8.7	0.06	0	0.07	2.5	0.86	0.69	0.6	1.03	1397.25	3013.97	270.6	134.45	4.3	2.83	0.59	0.05	0	0	0	12.21	0.66
2014 C2 Emerald	2014	C	2	Emerald	10.4	0.1734	60.2	3.57	94	22.7	26	24	15.5	25.3	22	24.6	23.6	14.8	23.7	49.1	47.88	0.04	97.02	Elution Norm - BG / gFW / RF(ng) / 2h	0.92	5.5	2.08	5.82	0	0.06	0.14	2.9	0.73	0.97	0.51	0.74	1211.26	3540.31	407.16	252.4	0	0	0.49	0	0	0	0	0	1.82
2014 C2 Endura	2014	C	2	Endura	10.9	0.1882	57.9	3.58	94	25.8	27.6	22.8	15.8	25.7	25.2	26.2	22.4	15.1	24.1	54.34	49.77	0.1	104.21	Elution Norm - BG / gFW / RF(ng) / 2h	2.8	9.76	2.24	5.56	0	0.69	1.1	3.44	0.89	1.7	0.7	13.1	1521.85	5532.11	482.81	458.88	2.32	0	0.42	0	0.59	0.36	0	0	2.66
2014 C2 Farthing	2014	C	2	Farthing	10.3	0.1244	82.8	3.68	94	25.7	26.9	25.1	10.9	25.6	25	25.4	24.7	10.1	24	48.46	44.13	1.52	94.12	Elution Norm - BG / gFW / RF(ng) / 2h	1.48	5.25	3.59	4.82	0.46	0.05	1.53	2.07	0.79	0.79	0.43	9.51	1091.65	2910.98	498.99	289.04	7.15	0	0.55	0	0	0	0	0	1.51
2014 C2 Meadowlark	2014	C	2	Meadowlark	9.6	0.0661	145.2	4.15	94	22.5	25.4	23.7	10.9	24.8	21.9	23.9	23.3	10.1	23.3	44.87	43.65	0.6	89.13	Elution Norm - BG / gFW / RF(ng) / 2h	0.85	6.37	3.53	6.35	0.25	0.34	0	1.93	1.24	1.27	0.53	39.75	1831.11	4407.68	345.22	328.94	0	0	0.64	0	0.42	0	0	0.66	9.27
2014 C2 Scintilla	2014	C	2	Scintilla	11.8	0.1577	74.6	3.54	94	29	27.1	30.2	14	29.3	28.3	25.6	29.8	13.3	27.8	58.1	54.18	3.23	115.51	Elution Norm - BG / gFW / RF(ng) / 2h	1.62	5.52	2.39	5.34	0	0	0.54	1.63	0.66	0.84	0.52	3.4	1898.11	3080.52	264.04	186.82	5.27	0	0.63	0	0	0	0	0	0.96
2014 C3 Emerald	2014	C	3	Emerald	11.4	0.447	25.5	4.22	82	19.8	23.4	22.1	15.6	25.9	19.6	22.5	22.1	15.9	25.4	47.07	47.4	0.04	94.51	Elution Norm - BG / gFW / RF(ng) / 2h	1	8.42	1.91	5.73	0	0	0.25	3.48	0.9	1.53	0.67	1.01	1312.39	4218.12	580.23	346.44	0	0	0.58	0	0	0	0	0	1.39
2014 C3 Endura	2014	C	3	Endura	10.8	0.487	22.2	3.49	82	16	22.1	18.4	21.8	24.3	15.7	21.1	18.4	22.1	23.8	50.76	48.62	0.3	99.68	Elution Norm - BG / gFW / RF(ng) / 2h	1.29	9.84	1.91	5.57	0	0.63	0.73	2.52	0.49	1.34	0.48	12.78	1073.8	4087.08	515.34	358.81	1.2	0	0.29	0	0	0	0	0	2.22
2014 C3 Farthing	2014	C	3	Farthing	10.1	0.2444	41.3	3.54	82	26.3	28.8	26	11.7	25.7	26	27.9	26	12	25.2	53.77	52	1.67	107.45	Elution Norm - BG / gFW / RF(ng) / 2h	2.61	7.58	3.17	6	0	0	0.83	2.75	0.97	1.2	0.49	35.5	1313.25	3316.38	595.71	266.19	13.35	0	0.44	0	0	0	0	0	1.56
2014 C3 Meadowlark	2014	C	3	Meadowlark	12.5	0.1614	77.3	4	82	24.2	26	23.5	9.1	25.2	23.9	25.1	23.5	9.4	24.7	44.77	46.13	1.43	92.33	Elution Norm - BG / gFW / RF(ng) / 2h	0.48	5.48	4.04	4.47	0	0.4	0	1.2	0.78	0.87	0.46	78.91	1310.09	3152.68	430.32	330.48	0	0	0.36	0	0.66	0	0	0	7.2
2014 C3 Primadonna	2014	C	3	Primadonna	11	0.1617	68	4.18	82	23.2	23.1	25.2	9.2	25.4	22.9	22.1	25.3	9.5	24.8	50.88	48.02	3.13	102.03	Elution Norm - BG / gFW / RF(ng) / 2h	2.59	6.39	4.73	5.97	0	0.54	0.54	2.98	0.78	0.74	0.42	220.18	922.49	3517.75	385.08	218.75	2.5	0	0.55	0	0	0	0	0	3.72
2014 C3 Scintilla	2014	C	3	Scintilla	12.9	0.2362	54.6	3.68	82	28.8	27.1	27.7	11.6	29.2	28.5	26.1	27.7	11.9	28.7	67.79	65.45	3.66	136.89	Elution Norm - BG / gFW / RF(ng) / 2h	2.77	5.93	1.8	5.77	0	0	0.84	1.62	0.76	0.84	0.43	13.34	1591.8	2665.41	255.19	196.27	4.89	0	0.41	0	0	0	0	0	0.83
2014 H1 Emerald	2014	H	1	Emerald	11.6	0.5099	22.8	2.99	108	15.9	24.7	17	26.3	26.9	15.4	23.6	17	26	26	42.92	46.72	0.21	90.07	Elution Norm - BG / gFW / RF(ng) / 2h	1.01	7.76	2.29	5.39	0	0.36	0.17	4.67	0.77	1.57	0.32	0.09	699.3	4121.85	430.86	156.73	0.14	1.25	0.63	0	0	0	0	0.07	2.55
2014 H1 Endura	2014	H	1	Endura	10.6	0.3747	28.3	2.97	108	14.7	25	17.2	27.1	27.4	14.2	23.9	17.1	26.9	26.5	40.12	41.77	0.26	82.41	Elution Norm - BG / gFW / RF(ng) / 2h	0.75	9.34	2.89	6.85	0	0.45	0.33	4.35	1.3	2.15	0.4	8.74	1198.8	5609.61	329.01	225.9	0.75	2.49	0.64	0.16	0.38	0	0	2.8	2.58
2014 H1 Farthing	2014	H	1	Farthing	11.1	0.3566	31.2	3.3	108	26.8	29.7	24.5	16.6	28.3	26.3	28.6	24.4	16.4	27.4	44.69	43.95	0.84	90.33	Elution Norm - BG / gFW / RF(ng) / 2h	1.89	8.06	5.58	7.19	0	0.42	1.18	3.12	1.43	1.67	0.32	15.52	1010.5	3436.65	676.21	220.49	9.44	3.95	0.52	0.03	0	0	0	1.73	1.65
2014 H1 Meadowlark	2014	H	1	Meadowlark	9.8	0.5076	19.3	3.09	108	24.5	28.9	22.8	17.8	28.5	24	27.8	22.7	17.6	27.6	38.46	42.62	0.06	81.19	Elution Norm - BG / gFW / RF(ng) / 2h	0.76	6.3	4.24	7.51	0	0.2	0.1	2.13	1.11	1.46	0.48	11.18	1481.76	4394.13	351.69	233.96	0	4.96	0.61	0	0.19	0	0	5.09	9.95
2014 H1 Primadonna	2014	H	1	Primadonna	11.3	0.1806	62.7	3.58	108	28.5	25.5	30.2	10.9	30.1	28.1	24.4	30.2	10.7	29.2	45.66	46.75	1.67	95.8	Elution Norm - BG / gFW / RF(ng) / 2h	2.28	7.47	3.83	10.45	0	0.25	0.73	4.54	2.12	1.54	0.39	39.63	1351.07	4528.64	410.55	284.41	0.07	1.62	0.85	0	0	0	0	5.82	4.58
2014 H1 Scintilla	2014	H	1	Scintilla	12.2	0.3316	36.7	3.13	108	28.8	31.3	25.8	19	30.6	28.3	30.2	25.7	18.8	29.7	47.32	47.91	0.89	97.03	Elution Norm - BG / gFW / RF(ng) / 2h	1.34	6.4	4.09	8.6	0	0.09	0.54	3.12	1.03	1.38	0.59	0.83	1141.44	3842.42	365.17	136.28	3.87	1.54	0.69	0	0	0	0	3.08	1.39
2014 H2 Emerald	2014	H	2	Emerald	11.8	0.6209	19	2.98	97	19.6	25.4	20.8	23.7	26.9	19.5	25.1	20.4	22.4	25.9	49.58	51.68	0.1	101.36	Elution Norm - BG / gFW / RF(ng) / 2h	1.41	9.01	2.1	5.35	0	0.21	0.33	4.23	0.66	1.85	0.43	0.42	850.63	4090.07	507.26	180.11	0	1.36	0.48	0	0	0	0	0	2.19
2014 H2 Endura	2014	H	2	Endura	11.5	0.5499	20.9	3.02	97	20.4	27.6	21.6	24	27.6	20.3	27.2	21.2	22.7	26.6	47.72	47.12	0.51	95.35	Elution Norm - BG / gFW / RF(ng) / 2h	0.75	8.1	3.49	4.76	0.5	0.52	1	3.27	0.5	1.83	0.49	10.33	972.07	4917.14	310.06	188.47	1.55	1.33	0.28	0	0	0	0	0	2.5
2014 H2 Farthing	2014	H	2	Farthing	11.3	0.1986	57.1	3.61	97	28.8	26.1	27.1	13.3	29.4	28.7	25.7	26.7	12	28.4	55.26	50.3	1.5	107.05	Elution Norm - BG / gFW / RF(ng) / 2h	1.73	9.04	8.93	6.9	3.68	0.28	3.22	3.37	0.79	1.41	0.55	9.77	1101.37	3702.62	675.02	313.67	7.68	3.71	0.49	0	0	0	0	0	1.7
2014 H2 Meadowlark	2014	H	2	Meadowlark	9.8	0.2822	34.8	3.29	97	24.9	25.2	23.5	20.4	28.2	24.8	24.9	23.1	19.1	27.1	43.97	46.62	0.56	91.15	Elution Norm - BG / gFW / RF(ng) / 2h	0.83	7.66	4.28	7.65	0.86	0.05	0	2.14	1.42	1.61	0.31	10.85	1887.93	4846.41	319.76	263.75	0.48	5.24	0.7	0	0	0	0	3.06	8.96
2014 H2 Primadonna	2014	H	2	Primadonna	12.3	0.2251	54.7	3.52	97	27.8	24.4	28.1	11.9	28.6	27.7	24.1	27.7	10.6	27.6	57.74	54.86	1.36	113.95	Elution Norm - BG / gFW / RF(ng) / 2h	1.79	6.95	2.22	7.61	0	0.09	0.22	4.19	1.68	1.5	0.44	14.83	1407.64	5301.23	400.6	267.63	0.46	2.61	0.96	0	0	0	0	2.98	4.14
2014 H2 Scintilla	2014	H	2	Scintilla	12.2	0.3603	34	3.3	97	26.3	28.5	25.8	17.8	29.4	26.2	28.2	25.4	16.5	28.3	58.1	56.7	1.41	116.22	Elution Norm - BG / gFW / RF(ng) / 2h	1.81	6.9	2.24	6.2	0	0	0.82	2.16	0.9	1.43	0.38	0.92	1420.78	3561.84	421.43	182.64	6.33	1.61	0.61	0	0	0	0	0	1.26
2014 H3 Emerald	2014	H	3	Emerald	11.5	0.3727	30.9	3.17	101	18.9	27.2	21.4	21.5	28	17.2	24.8	19.8	20.3	25.5	48.63	50.18	0.22	99.03	Elution Norm - BG / gFW / RF(ng) / 2h	0.81	5.2	2.47	4.04	0	0.11	0.14	3.05	0.59	0.94	0.51	0.28	832.97	3255.24	421.19	179.27	0	0.79	0.44	0	0	0	0	0	1.46
2014 H3 Endura	2014	H	3	Endura	10.7	0.3522	30.5	3.16	101	18.1	28.1	20.3	24.9	27.6	16.4	25.7	18.7	23.7	25	44.72	44.01	0.04	88.78	Elution Norm - BG / gFW / RF(ng) / 2h	0.81	6.48	3.79	3.89	0.21	0.45	0.37	2.73	0.37	1.16	0.49	11.32	1268.35	5017.01	227.44	190.16	1.76	1.04	0.41	0	0	0.18	0	0	2.37
2014 H3 Farthing	2014	H	3	Farthing	10.7	0.347	30.9	3.43	101	25.8	25.6	25.4	15.1	27.2	24.1	23.1	23.8	13.9	24.6	51.98	48.5	0.69	101.17	Elution Norm - BG / gFW / RF(ng) / 2h	1.38	7.31	4.48	7.52	0.78	0.09	0.84	3.44	0.84	1.21	0.51	7.2	1720.66	4182.36	453.11	237.91	8.42	3.52	0.75	0.2	0	0	0	0	1.5
2014 H3 Meadowlark	2014	H	3	Meadowlark	10.7	0.2045	52.3	3.48	101	30	29.1	29.3	13.1	29.9	28.3	26.6	27.7	11.9	27.3	49.08	49.85	0.07	99	Elution Norm - BG / gFW / RF(ng) / 2h	0.4	4.86	2.88	5.39	0	0.18	0	1.58	0.92	0.91	0.44	8.08	1720.19	3779.47	266.43	259.63	0	7.2	0.57	0	0.43	0	0	0.83	7.24
2014 H3 Primadonna	2014	H	3	Primadonna	13	0.1593	81.4	3.76	101	26.6	23.1	30.7	9.8	29.9	25	20.7	29.1	8.6	27.3	65.6	61.57	0.8	127.97	Elution Norm - BG / gFW / RF(ng) / 2h	0.71	5.84	2.64	9.45	0	0.25	0	4.68	1.62	0.98	0.37	97.71	2041.99	5216.17	199.62	207.84	0.47	1.48	1.1	0	0	0	0	4.81	3.03
2014 H3 Scintilla	2014	H	3	Scintilla	12.7	0.245	51.7	3.55	101	34.8	32.1	33.5	11.9	33.6	33.1	29.7	32	10.7	31.1	62.43	60.04	0.73	123.2	Elution Norm - BG / gFW / RF(ng) / 2h	0.95	5.05	1.52	6.47	0	0	1.18	2.09	1.13	0.94	0.46	2.19	1787.46	3159.38	227.06	154.24	5.89	1.44	0.58	0	0	0	0	2.26	0.75
2014 W1 Emerald	2014	W	1	Emerald	9.3	0.3882	24	3.64	101	16.6	22.3	19.5	16.1	22.4	15.7	20.6	18.3	15.4	20.9	40.13	39.11	0.13	79.37	Elution Norm - BG / gFW / RF(ng) / 2h	1.1	6.21	1.96	6.29	0.12	0.16	0.32	4.18	1.47	1.4	0.69	0.64	1338.95	4392.66	787.82	302.44	0	0.79	0.69	0	0.24	0	0	0	2.13
2014 W1 Endura	2014	W	1	Endura	10.5	0.2751	38.2	3.66	101	16.2	23.2	22.2	12.5	22.4	15.4	21.4	21.1	11.9	20.9	43.91	42.7	0.15	86.76	Elution Norm - BG / gFW / RF(ng) / 2h	1.06	7.61	1.26	3.82	0.22	0.64	0.65	3.28	1.14	1.72	0.49	24.77	1043	4771.62	484.68	413.5	5.77	0.57	0.38	0.05	1.23	0.17	0	0	2.43
2014 W1 Farthing	2014	W	1	Farthing	11.5	0.5242	21.9	3.4	101	22	31.5	21.2	22.4	28.3	21.2	29.7	20	21.7	26.8	51.05	49.22	0.48	100.75	Elution Norm - BG / gFW / RF(ng) / 2h	1.98	10.61	3.5	11.34	0.21	0.01	0.4	6.12	1.88	2.45	0.5	5.41	2516.21	6912.79	497.62	252.33	16.23	2.09	1.75	0.13	0.46	0	0	2.3	3.01
2014 W1 Meadowlark	2014	W	1	Meadowlark	10.8	0.1962	55	4.09	101	28.1	29.1	27	11.5	30.2	27.3	27.4	25.8	10.9	28.7	50.55	52.21	0.08	102.83	Elution Norm - BG / gFW / RF(ng) / 2h	0.66	8.37	1.87	8.97	0.73	0.21	0.06	2.16	2.28	1.87	0.46	12.65	2346.82	4559.09	400.29	328.11	0.13	7.23	0.83	0	0.42	0	0	5.56	11.04
2014 W1 Primadonna	2014	W	1	Primadonna	13	0.2192	59.3	4.22	101	28.2	25.7	29	10.7	29.3	27.3	23.9	27.8	10	27.8	55.49	52.94	3.07	111.5	Elution Norm - BG / gFW / RF(ng) / 2h	2.07	10.38	4.96	10.38	0.11	0.24	0.32	5.29	2.12	2.1	0.52	117.24	2356.11	6121.85	367.37	222.1	1.31	1.05	1.3	0	0.05	0	0	2.53	3.55
2014 W2 Emerald	2014	W	2	Emerald	11.9	0.8394	14.2	3.21	93	16.1	22.5	18.7	21.4	24.7	14.7	20.9	18.3	21.2	23.6	47.33	45.48	0.24	93.04	Elution Norm - BG / gFW / RF(ng) / 2h	2	11.56	8.22	12.11	0.19	0.53	0.21	6.21	2.08	2.46	0.83	0.93	1328.18	5463.17	853.2	293.51	0	1.79	1.07	0	0	0	0	6.28	2.32
2014 W2 Endura	2014	W	2	Endura	12	0.3957	30.3	3.34	93	21.3	20.8	23.2	14	25.6	19.9	19.3	22.8	13.8	24.6	48.56	44.6	0.13	93.3	Elution Norm - BG / gFW / RF(ng) / 2h	2.3	8.2	8.17	7.4	0.38	0.46	0.66	4.47	1.59	1.99	0.6	13.68	1034.75	4962.42	527.49	323.83	4.54	0.52	0.47	0.63	0.39	0	0	3.49	2.41
2014 W2 Farthing	2014	W	2	Farthing	12.6	0.3917	32.2	3.42	93	30	29.6	26.5	14.8	30.3	28.6	28	26	14.6	29.3	55.95	51.36	0.07	107.38	Elution Norm - BG / gFW / RF(ng) / 2h	3.88	9.49	2.45	12.5	0.07	0	0.49	5.5	2.97	1.84	0.8	5.42	1711.85	4873.18	577.16	247.24	14.39	2.06	0.92	1.24	0	0	0	12.5	1.57
2014 W2 Meadowlark	2014	W	2	Meadowlark	10.6	0.2577	41	3.73	93	21.4	22.8	22.3	11.8	24.9	20	21.3	21.8	11.6	23.9	46.64	45.13	0.24	92.01	Elution Norm - BG / gFW / RF(ng) / 2h	1.28	7.34	6.19	11.52	0.37	0.41	0.03	3.39	2.83	1.48	0.79	35.7	1684.31	4121.95	354.74	283.9	0	7.25	0.61	0	0.6	0	0	11.28	8.66
2014 W2 Primadonna	2014	W	2	Primadonna	12.6	0.2849	44.3	3.8	93	25.2	24.8	25.5	11.8	26.7	23.8	23.2	25	11.6	25.7	55.54	49.13	3.08	107.75	Elution Norm - BG / gFW / RF(ng) / 2h	1.34	10.78	3.25	12.9	0.11	0.13	0.18	6.32	3.28	1.96	0.88	78.99	1430.73	5085.42	398.64	236.22	0.36	1.66	0.82	0	0.13	0	0	10.39	2.02
2014 W3 Emerald	2014	W	3	Emerald	11.4	0.4138	27.6	3.38	80	20.5	26.8	22.1	20.6	27.7	19.2	25	20.9	20.2	26.1	54.79	51.77	0.46	107.02	Elution Norm - BG / gFW / RF(ng) / 2h	0.86	5.02	0	5.2	0	0.27	0.06	3.97	0.93	1.48	0.75	0.44	1179.98	4421.76	726.92	352.56	0	0.72	0.61	0	0	0	0	0	1.5
2014 W3 Endura	2014	W	3	Endura	10.5	0.2227	47	3.48	80	23.3	25.1	23.2	15.7	25.3	22.1	23.3	22	15.2	23.6	48.6	45.34	0.14	94.09	Elution Norm - BG / gFW / RF(ng) / 2h	1.44	5.13	0	4.37	0.13	0.53	0.11	3.21	0.46	1.05	2.33	16.8	1388.55	4903.84	361.89	303.65	10.33	0.35	0.46	0	0.21	0	0	0	1.97
2014 W3 Farthing	2014	W	3	Farthing	11.6	0.2059	56.3	3.63	80	29.8	31	26.6	13.3	29.1	28.5	29.2	25.5	12.8	27.4	54.41	50.23	0.14	104.78	Elution Norm - BG / gFW / RF(ng) / 2h	2.34	8.7	0	7.04	1.3	0	0.43	4.18	0.78	1.12	0.52	11.48	1928.68	4797.48	745.71	303.03	17.17	2.07	0.72	0.51	0	0	0	0.69	1.39
2014 W3 Meadowlark	2014	W	3	Meadowlark	10.1	0.305	33.1	3.5	80	26.4	29.4	25.9	14.6	28.7	25.1	27.6	24.7	14.1	27	44.48	44.89	0.53	89.9	Elution Norm - BG / gFW / RF(ng) / 2h	1.07	9.92	0	9.33	0.48	0.29	0	2.71	1.12	1.71	0.8	31.2	1784.48	4758.67	584.92	395.3	0	7.02	0.6	0	0.51	0	0	2.24	9.59
2014 W3 Primadonna	2014	W	3	Primadonna	11.7	0.1669	70.1	3.72	80	25.5	20	26.3	9.1	26.6	24.2	18.2	25.2	8.6	25	55.04	51.83	0.84	107.71	Elution Norm - BG / gFW / RF(ng) / 2h	2.44	8.77	2.73	9.1	0	0.17	0.19	6.16	1.4	1.63	0.77	145.67	1710.88	6027.45	458.76	277.07	7.58	1.18	0.87	0	0	0	0	5.39	2.88
				min	8.1	0.1	9.5	2.8	72	6.6	12.9	12.1	5.9	17	6	14.6	12	6.4	18.6	28.4	31.5	0	60.7		0.4	1.5	0	2.3	0	0	0	1.1	0.4	0.4	0	0	500.5	354.5	25.8	71.6	0	0	0.2	0	0	0	0	0	0.7
				max	13.9	1	145.2	4.4	109	34.8	32.1	33.5	36.9	33.6	33.1	30.8	32	36.4	31.7	69.9	76	5.7	140.4		4.3	23.7	28.7	15.1	3.7	2.1	3.2	7.1	3.3	5.4	2.3	411.7	3644.1	8351.9	901	458.9	17.2	8.5	2.3	1.2	1.2	0.4	4.1	31.4	15.3
				mean	10.9	0.4	35	3.5	92.3	22.3	24.8	22.9	15.6	26.1	22.6	25.1	23	15.5	25.9	49	49.9	1.6	100.5		1.4	6.2	4.5	5.8	0.2	0.2	0.4	3.2	1.1	1.3	0.3	28.1	1294.7	3989	322.2	194.2	2.5	1.8	0.7	0.1	0.1	0	0.3	1.9	3.4
[truncated: 29 more columns]
